# Supplementary material for: Design and performance evaluation of low-volatility and low-viscosity absorbents for CO2 capture
Source: Royal Society of Chemistry journal article supplement (doi:10.1039/d4re00379a), 2024-10-28
Supplement: d4re00379a1.pdf [file d4re00379a1.pdf]

# Supporting Information

## Design and performance evaluation of low-volatility low-viscosity absorbent for CO<sub>2</sub> capture

Ning Ma<sup>1</sup>, Liu Yang<sup>1</sup>, Zhenchang Fang<sup>2</sup>, Kaijia Jiang<sup>2</sup>, Xinling Li<sup>1,3\*</sup>, Zhen Huang<sup>2,\*</sup>

<sup>1</sup>College of Smart Energy, Shanghai Jiao Tong University, China.

<sup>2</sup>Key Laboratory of Power Machinery and Engineering, Ministry of Education, Shanghai Jiao Tong  
University, China

<sup>3</sup>Institute of Eco-Chongming (IEC), Shanghai 202162, China

\* Author for correspondence:

E-mail: lxl@sjtu.edu.cn (X.L.), z-huang@sjtu.edu.cn (Z.H.).

Number of pages: 11

Number of figures: 2

Number of tables:5

## **Text**

### **S1. Experimental Details (Page S3)**

S1.1. Absorption Parameter Definition and Calculation (Page S3)

### **S2. DFT and Molecular Dynamics Parameter Description (Page S3)**

S2.1. Quantum Computational Methods (Page S3)

S2.2. Molecular Dynamics Simulation (Page S4)

## **Figure captions**

**Figure S1.** Schematic diagram of the CO<sub>2</sub> bubbling absorption experimental setup. (Page S5)

**Figure S2.** Comparison of absorption performance of DETA/MEA/NMF and MDEA/MEA/H<sub>2</sub>O. (Page S6)

## **Table captions**

**Table S1.** Simulation analysis of hydrogen bonds formed and electrostatic solubility of MEA, MEA-CO<sub>2</sub> products in different solvents. (Page S7)

**Table S2.** The values of reaction rate constants (k) and the equilibrium constant (K) were estimated based on the activation free energy (E<sub>a</sub>, kJ/mol) and the gibbs free energy change (ΔG, kJ/mol). (Page S9)

**Table S3.** Absorption capacity and solution viscosity of the DETA/MEA/NMF at different temperatures. (Page S9)

**Table S4.** Boiling points and vapor pressures of the organic solvents(Page S10)

**Table S5.** Mass loss of MEA/H<sub>2</sub>O and DETA/MEA/NMF at different temperatures over 24 hours(Page S10)

## S1. Experimental Details

### S1.1. Absorption Parameter Definition and Calculation

The CO<sub>2</sub> absorption rate can be calculated by the difference between the inlet and outlet CO<sub>2</sub> concentrations:

$$\dot{V}_{CO_2} = \frac{V_0 (C_{in} - C_{out})}{(1 - \phi_{CO_2}) m_{abs}} \quad (S1)$$

where  $\dot{V}_{CO_2}$  is the CO<sub>2</sub> absorption rate, mol CO<sub>2</sub>/(min· kg);  $C_{in}$  and  $C_{out}$  are the CO<sub>2</sub> concentrations at the inlet and outlet of the absorber, respectively;  $m_{abs}$  is the mass of the absorbent;  $V_0$  is the ideal gas molar volume (22.4 L/mol);  $Q_{in}$  is the gas flow rate at the inlet.  $P_{act}$  and  $P_0$  are the atmospheric pressures under the actual and standard state, respectively, kPa;  $T_{act}$  and  $T_0$  are the temperatures under the actual and standard state, respectively, K.

The CO<sub>2</sub> absorption capacity can be obtained by integrating the absorption rate versus absorption time:

$$V_{CO_2} = \int_0^t \dot{V}_{CO_2} dt \quad (S2)$$

where  $V_{CO_2}$  is the CO<sub>2</sub> absorption capacity, mol/kg, and  $t$  is the absorption time, min.

## S2. Calculation Parameter Description

### S2.1. Quantum Computational Methods.

The molecular configurations, harmonic frequencies, and Gibbs free energies of the reactants, products, and transition states were optimized and calculated at the B3LYP/6-311++G(d, p) level using the density functional theory within the Gaussian 16W package<sup>1,2</sup>. The solvent effect was simulated using a universal implicit solvent model (SMD). Based on the results, the natural population analysis (NBO) charge

distribution of the partial charges and electrostatic potential surfaces (EPS) were visualized with the GaussView 6.0.16 interface<sup>3</sup>. Calculation details can be found in the SI.

## S2.2. Molecular Dynamics Simulation.

In MS 2023, the Forcite model is used to calculate hydrogen bond, van der Waals (vdW) solubility, and electrostatic solubility. The COMPASS III force field (Condensed-phase Optimized Molecular Potentials for Atomistic Simulation Studies) is employed for simulating chemicals, a widely applied force field in molecular dynamics. After three optimizations (Dmol3 geometric optimization, Forcite geometric optimization, and NVT dynamic simulation for 100 ps), molecular interactions (hydrogen bond strength) and solubility parameters are elucidated using molecular dynamics simulations at 313K. Electrostatics are based on Ewald summation, and van der Waals forces are based on atomic calculations. The hydrogen bond is thought to exist between A and H if the distance  $|A-H| < 2.7 \text{ \AA}$  and the angle  $D-H-A > 120^\circ$ . The hydrogen bond calculation results were taken as the average of 200 frames.

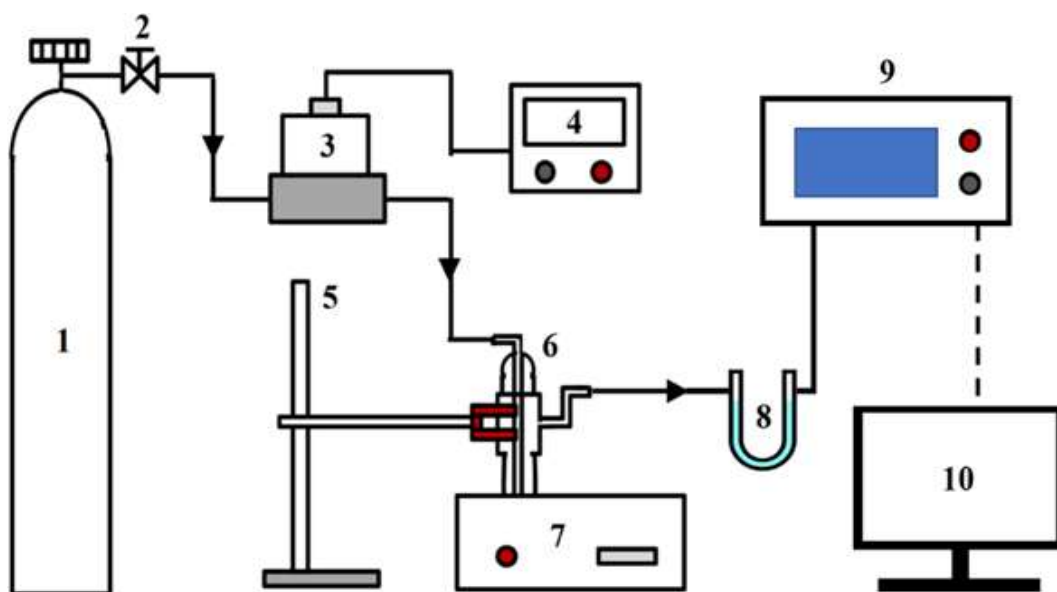

**Fig S1.** Schematic diagram of the CO<sub>2</sub> bubbling absorption experimental setup

1. Air intake cylinder; 2. Pressure reducing valve; 3. Mass flow controller; 4. flow rate indicator; 5. iron frame platform; 6. Bubbler; 7. Digital display constant temperature water bath; 8. drying device; 9. CO<sub>2</sub> concentration detector; 10. Data storage and processing equipment

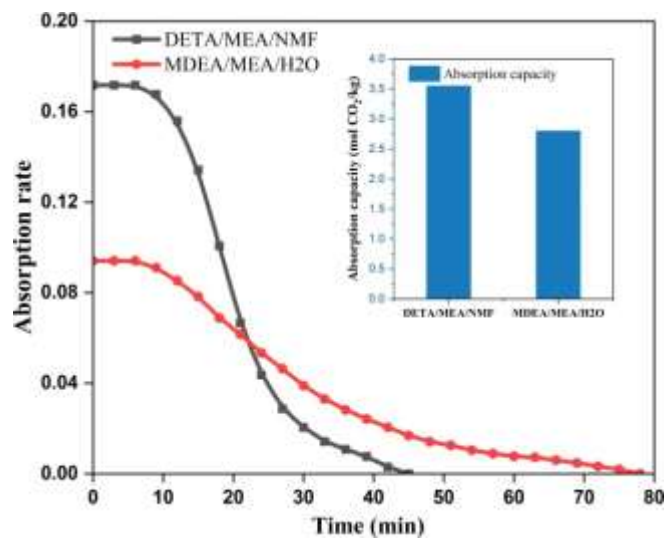

**Fig S2.** Comparison of absorption performance of DETA/MEA/NMF and MDEA/MEA/H<sub>2</sub>O. (C<sub>total</sub>

amine: 5 M; V<sub>solution</sub>: 25 mL; T<sub>absorption</sub>: 313.15 K; Q<sub>10% CO<sub>2</sub></sub>: 1L/min)

Table S1 Simulation analysis of hydrogen bonds formed and electrostatic solubility of MEA, MEA-CO<sub>2</sub> products in different solvents.

| Absorbent name         | Molecular number ratio                                   | Hydrogen bond numbers | Average Hydrogen bond Length (Å) | Electrostatic solubility |
|------------------------|----------------------------------------------------------|-----------------------|----------------------------------|--------------------------|
| MEA-EG                 | MEA : EG = 100 : 251                                     | 780                   | 2.021                            | 30.23                    |
| MEA carbamate-EG       | MEA carbamate : MEAH <sup>+</sup> : EG = 50 : 50 : 251   | 1071                  | 2.010                            | 47.24                    |
| MEA-carbamic acid-EG   | MEA-carbamic acid : EG = 100 : 251                       | 852                   | 2.008                            | 28.00                    |
| MEA- NMF               | MEA : NMF = 100 : 240                                    | 454                   | 2.207                            | 22.07                    |
| MEA carbamate-NMF      | MEA carbamate : MEAH <sup>+</sup> : NMF = 50 : 50 : 240  | 696                   | 2.081                            | 42.73                    |
| MEA-carbamic acid-NMF  | MEA-carbamic acid : NMF = 100 : 240                      | 542                   | 2.117                            | 21.61                    |
| MEA- DMSO              | MEA : DMSO = 100 : 197                                   | 213                   | 2.211                            | 14.53                    |
| MEA carbamate-DMSO     | MEA carbamate : MEAH <sup>+</sup> : DMSO = 50 : 50 : 197 | 445                   | 2.028                            | 39.00                    |
| MEA-carbamic acid-DMSO | MEA-carbamic acid : DMSO = 100 : 197                     | 299                   | 2.088                            | 15.65                    |
| MEA- DMF               | MEA : DMF = 100 : 181                                    | 231                   | 2.165                            | 18.07                    |
| MEA carbamate-DMF      | MEA carbamate : MEAH <sup>+</sup> : DMF = 50 : 50 : 181  | 421                   | 2.002                            | 42.06                    |
| MEA-carbamic acid-DMF  | MEA-carbamic acid : DMF = 100 : 181                      | 295                   | 2.008                            | 19.15                    |
| MEA- NMP               | MEA : NMP = 100 : 145                                    | 216                   | 2.166                            | 15.22                    |
| MEA carbamate-NMP      | MEA carbamate : MEAH <sup>+</sup> : NMP = 50 : 50 : 145  | 430                   | 2.005                            | 40.11                    |

|                                |                                                                  |     |       |       |
|--------------------------------|------------------------------------------------------------------|-----|-------|-------|
| MEA-carbamic acid-NMP          | MEA-carbamic acid : NMP = 100 : 145                              | 290 | 2.017 | 16.65 |
| MEA- EGME                      | MEA : EGME = 100 : 178                                           | 450 | 2.103 | 21.59 |
| MEA carbamate-EGME             | MEA carbamate : MEAH <sup>+</sup> : EGME = 50 : 50 : 178         | 688 | 2.017 | 43.65 |
| MEA-carbamic acid-EGME         | MEA-carbamic acid : EGME = 100 : 178                             | 523 | 2.048 | 20.91 |
| MEA-BUTANOL                    | MEA : BUTANOL = 100 : 153                                        | 372 | 2.030 | 20.86 |
| MEA carbamate-BUTANOL          | MEA carbamate : MEAH <sup>+</sup> : BUTANOL = 50 : 50 : 153      | 619 | 1.983 | 44.52 |
| MEA-carbamic acid-BUTANOL      | MEA-carbamic acid : BUTANOL = 100 : 153                          | 445 | 1.987 | 20.14 |
| MEA-Cyclohexanol               | MEA : Cyclohexanol = 100 : 132                                   | 317 | 2.044 | 18.07 |
| MEA carbamate-Cyclohexanol     | MEA carbamate : MEAH <sup>+</sup> : Cyclohexanol = 50 : 50 : 132 | 581 | 1.990 | 41.91 |
| MEA-carbamic acid-Cyclohexanol | MEA-carbamic acid : Cyclohexanol = 100 : 132                     | 396 | 1.992 | 17.88 |
| MEA-ISOBUTANOL                 | MEA : ISOBUTANOL = 100 : 152                                     | 359 | 2.021 | 20.15 |
| MEA carbamate-ISOBUTANOL       | MEA carbamate : MEAH <sup>+</sup> : ISOBUTANOL = 50 : 50 : 152   | 608 | 1.980 | 44.59 |
| MEA-carbamic acid-ISOBUTANOL   | MEA-carbamic acid : ISOBUTANOL = 100 : 152                       | 427 | 1.982 | 19.55 |



Table S2. The values of reaction rate constants (k) and the equilibrium constant (K) were estimated based on the activation free energy (Ea, kJ/mol) and the gibbs free energy change ( $\Delta G$ , kJ/mol)

|       | Ea       | $\Delta G$ | k         | K         |
|-------|----------|------------|-----------|-----------|
| MEA1  | 5.616732 | -19.1827   | 6.434E+11 | 2.304E+03 |
| MEA2  | 1.872244 | -27.1422   | 2.916E+12 | 5.725E+04 |
| DETA1 | 3.930636 | -23.3312   | 1.271E+12 | 1.230E+04 |
| DETA2 | 0.919188 | -30.7375   | 4.285E+12 | 2.443E+05 |

Table S3. Absorption capacity and solution viscosity of the DETA/MEA/NMF at different temperatures

| Absorption temperature, K | Absorption capacity, mol CO <sub>2</sub> /kg | Viscosity of saturated solution, mPa·s |
|---------------------------|----------------------------------------------|----------------------------------------|
| 293                       | 3.84                                         | 220.61                                 |
| 303                       | 3.75                                         | 123.34                                 |
| 313                       | 3.55                                         | 60.48                                  |
| 323                       | 3.40                                         | 36.34                                  |
| 333                       | 3.20                                         | 20.31                                  |

Table S4. vapor pressures, boiling points and specific heat capacities of the organic solvents<sup>4</sup>

| Organic solvents | Vapor pressure at 373K, | Boiling point at 1 atm, | Specific heat capacity, |
|------------------|-------------------------|-------------------------|-------------------------|
|                  | kPa                     | K                       | kJ/(kg· K)              |
| DMSO             | 4.99                    | 462                     | 1.95                    |
| EG               | 2.15                    | 468                     | 2.35                    |
| DMF              | 21.12                   | 426                     | 2.14                    |
| NMF              | 3.00                    | 456                     | 2.07                    |
| Isobutanol       | 75.62                   | 381                     | 2.39                    |
| Butanol          | 51.56                   | 390                     | 2.33                    |
| EGME             | 44.35                   | 398                     | 2.20                    |
| NMP              | 3.34                    | 475                     | 1.77                    |
| Cyclohexanol     | 10.52                   | 434                     | 2.15                    |

Table S5. Mass loss of MEA/H<sub>2</sub>O and DETA/MEA/NMF at different temperatures over 24 hours

| Temperature, K | Time, hour | Mass loss, g         |              |
|----------------|------------|----------------------|--------------|
|                |            | MEA/H <sub>2</sub> O | DETA/MEA/NMF |
| 293            | 6          | 0.0070               | 0.0025       |
| 293            | 12         | 0.0064               | 0.0037       |
| 293            | 24         | 0.0117               | 0.0077       |
| 353            | 6          | 0.0662               | 0.0274       |
| 353            | 12         | 0.0794               | 0.0300       |
| 353            | 24         | 0.1983               | 0.0633       |

## REFERENCES

- (1) Frisch, M. J. Gaussian 16 Rev. C.01, 2016.
- (2) Yu, Y.; Shen, Y.; Zhou, X.; Liu, F.; Zhang, S.; Lu, S.; Ye, J.; Li, S.; Chen, J.; Li, W. Relationship between Tertiary Amine's Physical Property and Biphasic Solvent's CO<sub>2</sub> Absorption Performance: Quantum Calculation and Experimental Demonstration. *Chem. Eng. J.* **2022**, *428*, 131241. <https://doi.org/10.1016/j.cej.2021.131241>.
- (3) Al-Marri, M. J.; Khader, M. M.; Giannelis, E. P.; Shibl, M. F. Optimization of Selection of Chain Amine Scrubbers for CO<sub>2</sub> Capture. *J. Mol. Model.* **2014**, *20* (12), 2518. <https://doi.org/10.1007/s00894-014-2518-8>.
- (4) Dykyj, J.; Svoboda, J.; Wilhoit, R. C.; Frenkel, M.; Hall, K. R.; Hall, K. R. Organic Compounds, C1 to C57. Part 1: Datasheet from Landolt-Börnstein - Group IV Physical Chemistry · Volume 20B: "Vapor Pressure and Antoine Constants for Oxygen Containing Organic Compounds" in SpringerMaterials ([https://doi.org/10.1007/10688583\\_3](https://doi.org/10.1007/10688583_3)). [https://doi.org/10.1007/10688583\\_3](https://doi.org/10.1007/10688583_3).
